# Supplementary material
Source: PubMed Central journal article supplement (PMC3567625)
Supplement: supp_M112.426155_jbc.M112.426155-1.pdf [file supp_M112.426155_jbc.M112.426155-1.pdf]

**Supplementary Table 1. Group L UGTs included in phylogenetic analysis**

| GT                 | Species                        | Acc. no.     | Activity                                                | Source     |
|--------------------|--------------------------------|--------------|---------------------------------------------------------|------------|
| UGT74B1            | <i>Arabidopsis thaliana</i>    | AAC00570     | Thiohydroximate glucosyltransferase                     | 1          |
| UGT74C1            | <i>Arabidopsis thaliana</i>    | AAD32293     | -                                                       | 3          |
| UGT74D1            | <i>Arabidopsis thaliana</i>    | AEC08580     | Jasmonate glucosyltransferase                           | 2          |
| UGT74E1            | <i>Arabidopsis thaliana</i>    | POC7P7       | -                                                       | 3          |
| UGT74F2            | <i>Arabidopsis thaliana</i>    | AAB64024     | Salicylic acid and anthranilic acid glucosyltransferase | 4-6        |
| UGT75B1            | <i>Arabidopsis thaliana</i>    | AEE27854     | Indole-3-acetic acid glucosyltransferase                | 29         |
| UGT75C1            | <i>Arabidopsis thaliana</i>    | CAB10189     | Anthocyanin-5-O-glucosyltransferase                     | 7          |
| UGT75D1            | <i>Arabidopsis thaliana</i>    | CAB10333     | Flavonoid glucosyltransferase                           | 8          |
| UGT84A1            | <i>Arabidopsis thaliana</i>    | AEE83609     | Hydroxybenzoate glucosyltransferase                     | 4          |
| UGT84B1            | <i>Arabidopsis thaliana</i>    | AAB87119     | Indole-3-acetic acid glucosyltransferase                | 9          |
| UGT74H5            | <i>Avena strigosa</i>          | ACD03250     | N-methylanthranilate glucosyltransferase                | This study |
| UGT74H6            | <i>Avena strigosa</i>          | ACD03261     | Benzoic acid glucosyltransferase                        | This study |
| UGT74H7            | <i>Avena strigosa</i>          | ACD03246     | -                                                       | This study |
| UGT84C2            | <i>Avena strigosa</i>          | ACD03236     | -                                                       | This study |
| UGT75E2            | <i>Avena strigosa</i>          | ACD03260     | -                                                       | This study |
| UGT75E3            | <i>Avena strigosa</i>          | ACD03251     | -                                                       | This study |
| UGT75D1 like6      | <i>Brachypodium distachyon</i> | XP_003576359 | -                                                       | *          |
| UGT75D1 like5      | <i>Brachypodium distachyon</i> | XP_003560621 | -                                                       | *          |
| UGT75D1 like4      | <i>Brachypodium distachyon</i> | XP_003571494 | -                                                       | *          |
| UGT84A2 like       | <i>Brachypodium distachyon</i> | XP_003565946 | -                                                       | *          |
| Cinnamate-GT like2 | <i>Brachypodium distachyon</i> | XP_003567004 | -                                                       | *          |
| Cinnamate-GT like1 | <i>Brachypodium distachyon</i> | XP_003571042 | -                                                       | *          |
| IAA-GT like        | <i>Brachypodium distachyon</i> | XP_003559553 | -                                                       | *          |
| UGT74F1 like1      | <i>Brachypodium distachyon</i> | XP_003578449 | -                                                       | *          |
| UGT74F1 like2      | <i>Brachypodium distachyon</i> | XP_003576736 | -                                                       | *          |
| UGT74F2 like       | <i>Brachypodium distachyon</i> | XP_003578448 | -                                                       | *          |
| UGT84A9a           | <i>Brassica napus</i>          | CAS03354     | Sinapate glucosyltransferase                            | 10         |
| CsGT45             | <i>Crocus sativus</i>          | ACM66950     | Flavonoid glucosyltransferase                           | 11         |
| EpGT-1             | <i>Eucalyptus perriniana</i>   | BAD90934     | Monoterpene glucosyltransferase                         | 12         |
| EpGT-2             | <i>Eucalyptus perriniana</i>   | BAD90935     | Monoterpene glucosyltransferase                         | 12         |
| 5GT-A              | <i>Eustoma grandiflorum</i>    | BAF49285     | Anthocyanin 5-O-glucosyltransferase                     | 13         |
| FaGT2              | <i>Fragaria x ananassa</i>     | Q66PF4       | Cinnamate glucosyltransferase                           | 14         |
| 5GT7               | <i>Gentiana triflora</i>       | BAG32255     | Anthocyanin 5-O-glucosyltransferase                     | 15         |
| HGT8               | <i>Glandularia x hybrida</i>   | BAA36423     | Anthocyanin 5-O-glucosyltransferase                     | 16         |
| GgSGT              | <i>Gomphrena globosa</i>       | BAG14302     | Sinapate glucosyltransferase                            | 17         |
| ant5GT             | <i>Iris hollandica</i>         | BAD06874     | Anthocyanin 5-O-glucosyltransferase                     | 18         |
| HCA1GT-1           | <i>Lobelia erinus</i>          | BAF99686     | Hydroxycinnamate-O-glucosyltransferase                  | 19         |
| SAGTase            | <i>Nicotiana tabacum</i>       | AAF61647     | Salicylic acid glucosyltransferase                      | 21         |
| Os11g0145200       | <i>Oryza sativa</i>            | NP_001065729 | -                                                       | *          |
| Os02g0203300       | <i>Oryza sativa</i>            | NP_001046237 | -                                                       | *          |

Supplementary Table 1 continued...

|              |                             |              |                                                                                       |        |
|--------------|-----------------------------|--------------|---------------------------------------------------------------------------------------|--------|
| Os01g0686300 | <i>Oryza sativa</i>         | NP_001043905 | -                                                                                     | *      |
| Os01g0686200 | <i>Oryza sativa</i>         | NP_001043904 | -                                                                                     | *      |
| Os03g0693600 | <i>Oryza sativa</i>         | NP_001050964 | -                                                                                     | *      |
| Os09g0518000 | <i>Oryza sativa</i>         | NP_001063684 | -                                                                                     | *      |
| Os09g0518200 | <i>Oryza sativa</i>         | NP_001063685 | -                                                                                     | *      |
| Pf3R4        | <i>Perilla frutescens</i>   | BAA36421     | Anthocyanin 5-O-glucosyltransferase                                                   | 16     |
| F7GT         | <i>Pyrus comunnis</i>       | AAAY27090    | Flavonoid 7-O-glucosyltransferase                                                     | 22     |
| GAGT         | <i>Solanum lycopersicum</i> | CAI62049     | Gentisic acid xylosyltransferase<br>Triterpene carboxylic acid<br>glucosyltransferase | 20     |
| UGT74M1      | <i>Vaccaria hispanica</i>   | ABK76266     | Resveratrol/hydroxycinnamic acid O-<br>glucosyltransferase                            | 24     |
| ResOGT       | <i>Vitis labrusca</i>       | ABH03018     | glucosyltransferase                                                                   | 25     |
| IAGLU        | <i>Zea mays</i>             | NP_001150551 | Indole-3-acetate beta-glucosyltransferase                                             | 26, 27 |
| IAGT         | <i>Zea mays</i>             | NP_001150551 | -                                                                                     | 26     |
| UGT2         | <i>Crocus sativus</i>       | AAP94878     | Croctin glucosyltransferase                                                           | 28     |

\*Predicted by automated computational analysis

## References

1. Grubb, C. D., Zipp, B. J., Ludwig-Muller, J., Masuno, M. N., Molinski, T. F., and Abel, S. (2004) *Plant J* **40**, 893-908
2. Song, J. T., Koo, Y. J., Seo, H. S., Kim, M. C., Choi, Y. D., and Kim, J. H. (2008) *Phytochemistry* **69**, 1128-1134
3. Li, Y., Baldauf, S., Lim, E. K., and Bowles, D. J. (2001) *J Biol Chem* **276**, 4338-4343
4. Lim, E. K., Doucet, C. J., Li, Y., Elias, L., Worrall, D., Spencer, S. P., Ross, J., and Bowles, D. J. (2002) *J Biol Chem* **277**, 586-592
5. Quiel, J. A., and Bender, J. (2003) *J Biol Chem* **278**, 6275-6281
6. Dean, J. V., and Delaney, S. P. (2008) *Physiologia plantarum* **132**, 417-425
7. Gachon, C. M., Langlois-Meurinne, M., Henry, Y., and Saindrenan, P. (2005) *Plant Mol Biol* **58**, 229-245
8. Messner, B., Thulke, O., Schäffner, A. R., (2005) *Planta* **217**, 138-146
9. Jackson, R. G., Lim, E. K., Li, Y., Kowalczyk, M., Sandberg, G., Hoggett, J., Ashford, D. A., and Bowles, D. J. (2001) *J Biol Chem* **276**, 138-146
10. Mittasch, J., Mikolajewski, S., Breuer, F., Strack, D., and Milkowski, C. (2010) *Theor Appl Genet* **276**, 138-146
11. Moraga, A. R., Mozos, A. T., Ahrazem, O., and Gomez-Gomez, L. (2009) *BMC Plant Biol* **9**, 109
12. Nagashima, S., Tomo, S. and Yoshikawa, T. (2005) *NCBI direct submission*
13. Noda, N., Kanno, Y. and Suzuki, M. (2002) *NCBI direct submission*
14. Landmann, C., Fink, B., and Schwab, W. (2007) *Planta* **226**, 417-428
15. Nakatsuka, T., Sato, K., Takahashi, H., Yamamura, S. and Nishihara, M. (2008) *J Exp Bot* **59**, 1241-1252
16. Yamazaki, M., Gong, Z., Fukuchi-Mizutani, M., Fukui, Y., Tanaka, Y., Kusumi, T. and Saito, K. (1999) *J Biol Chem* **274**, 7405-7411
17. Matsuba, Y., Okuda, Y., Abe, Y., Kitamura, Y., Terasaka, K., Mizukami, H., Kamakura, H., Kawahara, N., Goda, Y., Sasaki, N. and Ozeki, Y. (2008) *Plant Biotechnol* **25**, 369-375

18. Imayama, T., Yoshihara, N., Fukuchi-Mizutani, M., Tanaka, Y., Ino, I. and Yabuya, T. (2004) *Plant Sci* **167**, 1243-1248
19. Noda, N., Kazauma, K. and Suzuki, M. (2005) *NCBI direct submission*
20. Tarraga, S., Lison, P., Lopez-Gresa, M. P., Torres, C., Rodrigo, I., Belles, J. M., and Conejero, V. (2010) *J Exp Bot* **61**, 4325-4338
21. Lee, H. I., and Raskin, I. (1999) *J Biol Chem* **274**, 36637-36642
22. Gosch, C., Halbwirth, H. and Stich, K. (2005) *Trees* **21**, 521-529
23. Richman, A., Swanson, A., Humphrey, T., Chapman, R., McGarvey, B., Pocs, R., and Brandle, J. (2005) *Plant J* **41**, 56-57
24. Meesapyodsuk, D., Balsevich, J., Reed, D. W., and Covello, P. S. (2007) *Plant Physiol* **143**, 959-969
25. Hall, D., De Luca, V., (2007) *Plant J* **49**, 579-591
26. Alexandrov, N. N., Brover, V. V., Freidin, S., Troukhan, M. E., Tatarinova, T. V., Zhang, H., Swaller, T. J., Lu, Y. P., Bouck, J., Flavell, R. B., and Feldmann, K. A. (2009) *Plant Mol Biol* **69**, 179-194
27. Szerszen, J. B., Szczyglowski, K., and Bandurski, R. S. (1994) *Science* **265**, 1699-1701
28. Moraga, A. R., Nohales, P. F., Perez, J. A., and Gomez-Gomez, L. (2004) *Planta* **219**, 955-966
29. Jackson, R. G., Lim, E. K., Li, Y., Kowalczyk, M., Sandberg, G., Hoggett, J., Ashford, D. A. & Bowles, D. J. (2007) *J Biol Chem* **276**, 4350-4356

**Supplementary Table 2. Oligonucleotide primer sequences**

---

| <b>Primer no.</b>                | <b>DNA template</b> | <b>Oligonucleotide primer sequence (5'→3')</b> |
|----------------------------------|---------------------|------------------------------------------------|
| <b>For His<sub>6</sub> tags:</b> |                     |                                                |
| 1                                | <i>UGT74H5</i>      | GGAATTCATATGGGGGCTGAGTGGGAG                    |
| 2                                | <i>UGT74H5</i>      | GGAATTCATATGTCA TGCATCTAACCCAC                 |
| 3                                | <i>UGT74H7</i>      | GGAATTCATATGGGGGCTGAGCCGGGCCACGTA              |
| 4                                | <i>UGT74H7</i>      | GGAATTCATATGCTAGATTTGTTTGGGCTGAGTTG            |
| 5                                | <i>UGT74H6</i>      | GGAATTCATATGGGGGCTGAGCCGGGCCACGTA              |
| 6                                | <i>UGT74H6</i>      | GGAATTCATATGTCAGATGATTAATTTCTGGGATTTTC         |
| <b>For native protein:</b>       |                     |                                                |
| 7                                | <i>UGT74H5</i>      | TTCATATGGGGGCTGAGTGGGAG                        |
| 8                                | <i>UGT74H5</i>      | AGGAATTCATATGTCA TGCATCTAACCCAC                |
| 9                                | <i>UGT74H7</i>      | TTCATATGGGGGCTGAGCCGGGCCACGTA                  |
| 10                               | <i>UGT74H7</i>      | CTGAATTCATATGCTAGATTTGTTTGGGCTGAGTTG           |
| 11                               | <i>UGT74H6</i>      | TACATATGGGGGCTGAGCCGGGCCACGTA                  |
| 12                               | <i>UGT74H6</i>      | GGAATTCATCAGATGATTAATTTCTGGGATTTTC             |

---

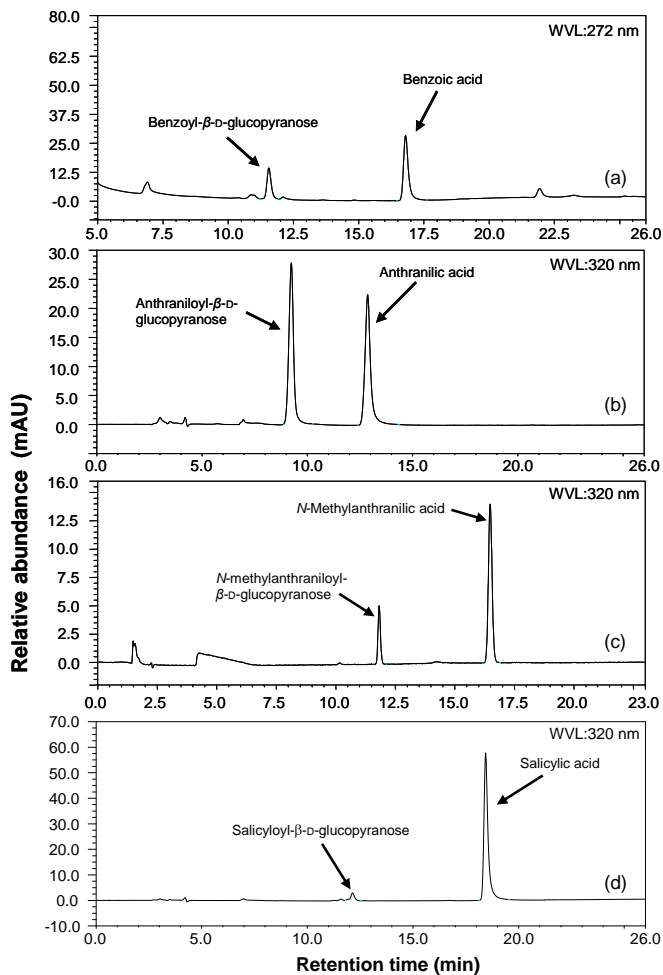

**Supplementary Figure 1A.** HPLC analysis of glucosylated products following assays with purified recombinant UGT74H5. Reactions were performed in 5 mM UDP-D-glucose, pH 6.8 at 30°C for 30 minutes with 100  $\mu$ M benzoic acid (a), anthranilic acid (b), *N*-methylantranilic acid (c) or salicylic acid (d). Reactions were analysed by reversed phase HPLC using a LUNA 5- $\mu$ m C18 column (150 x 4.6 mm, Phenomenex) with a linear gradient of acetonitrile in water (10-40 % for anthranilate and *N*-methylantranilate; 10-60% for salicylic acid and benzoic acid). The retention times of the glucose conjugates were (a) 11.6 min; (b) 9.2 min; (c) 11.8 min; (d) 12.1 min. Detection wavelengths (WVL) are indicated.

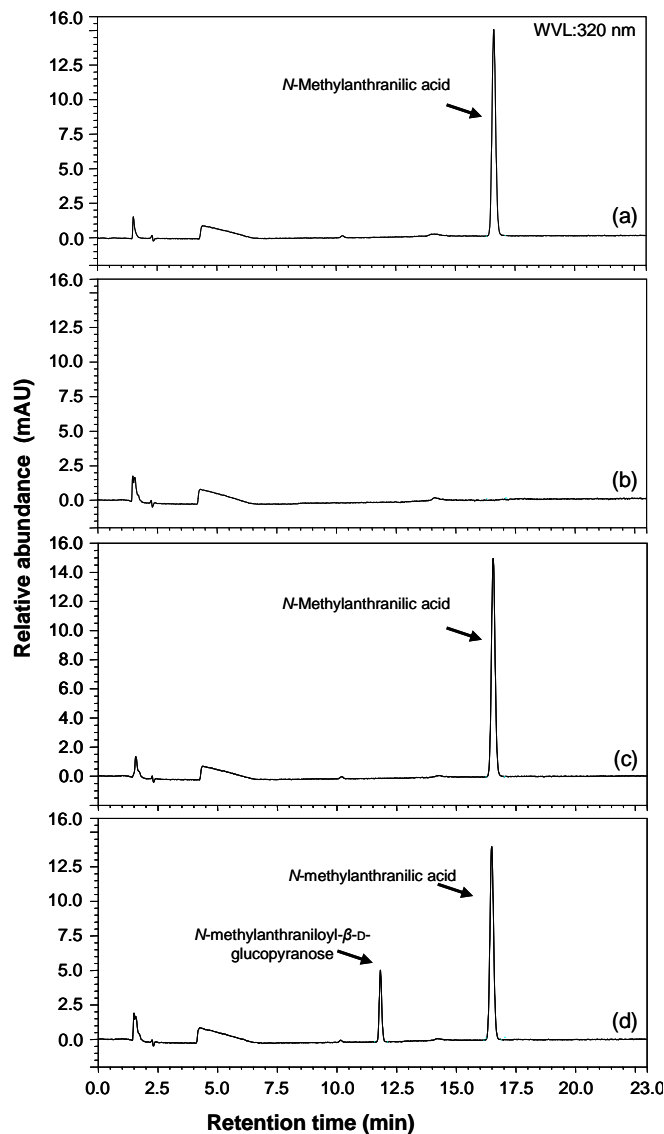

**Supplementary Figure 1B.** HPLC analysis for assays of purified recombinant UGT74H5 with *N*-methylantranilate. Reactions were performed with 0.5 mM UDP-D-glucose, 0.2 mM *N*-methylantranilic acid at pH 7.5, 30°C for 30 minutes. Controls include assays with inactivated enzyme (a), minus *N*-methylantranilic acid (b) and minus UDP-D-glucose (c); (d) reaction with active enzyme. Samples were analysed as for Supplementary Figure 1A. The retention times ( $R_t$ ) of *N*-methylantranilic acid and *N*-methylantraniloyl- $\beta$ -D-glucopyranose were 16.5 min and 11.8 min, respectively. The detection wavelength (WVL) is indicated.

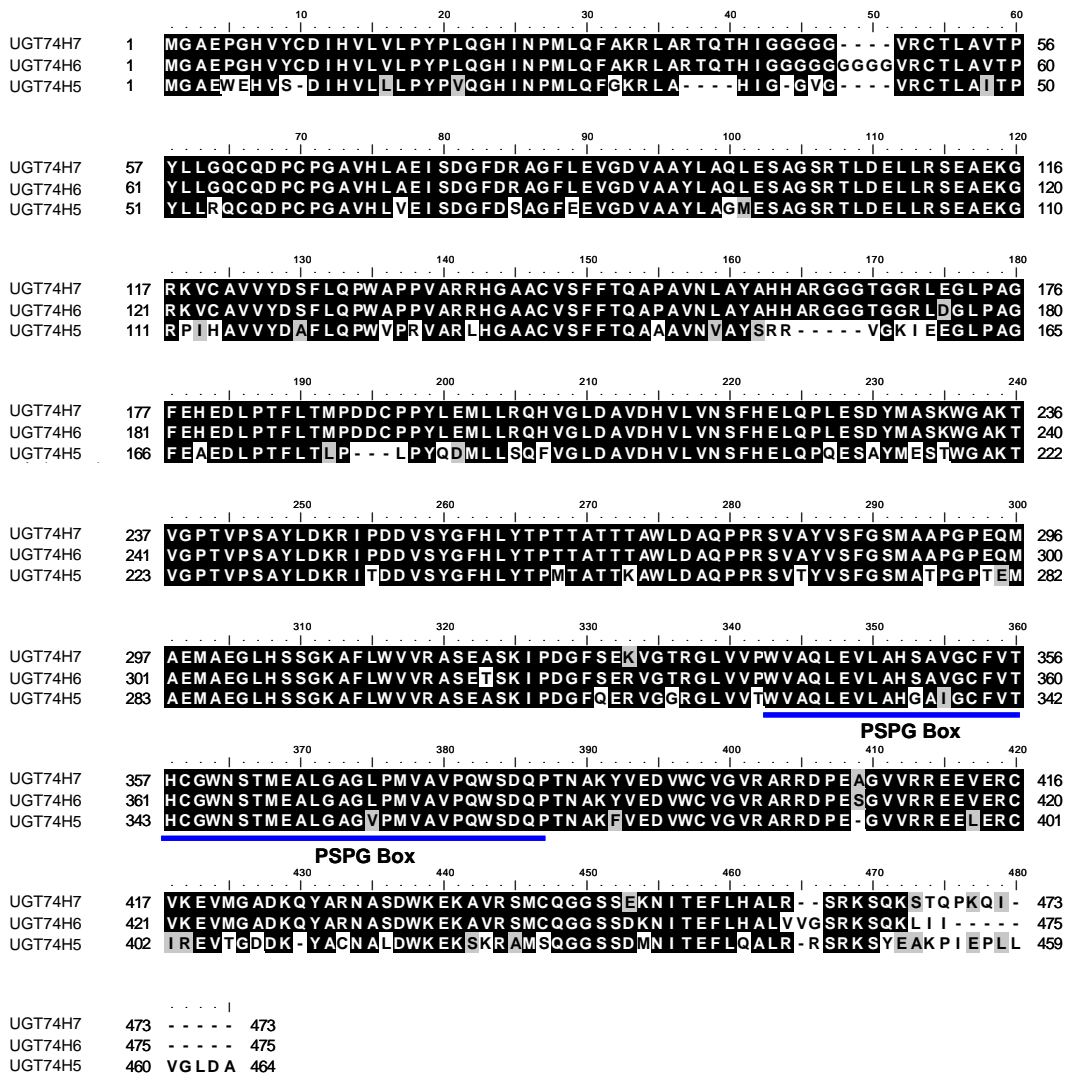

### Supplementary Figure 2.

Alignment of amino acid sequences of UGT74H5 and two other closely related GTs expressed in oat roots (UGT74H6 and UGT74H7). Identical amino acids are highlighted in black and similar amino acids in grey. The PSPG box (a conserved region corresponding to the UDP-D-glucose binding domain; Hughes and Hughes, 1994; *DNA Seq* 5: 41-49) is underlined.

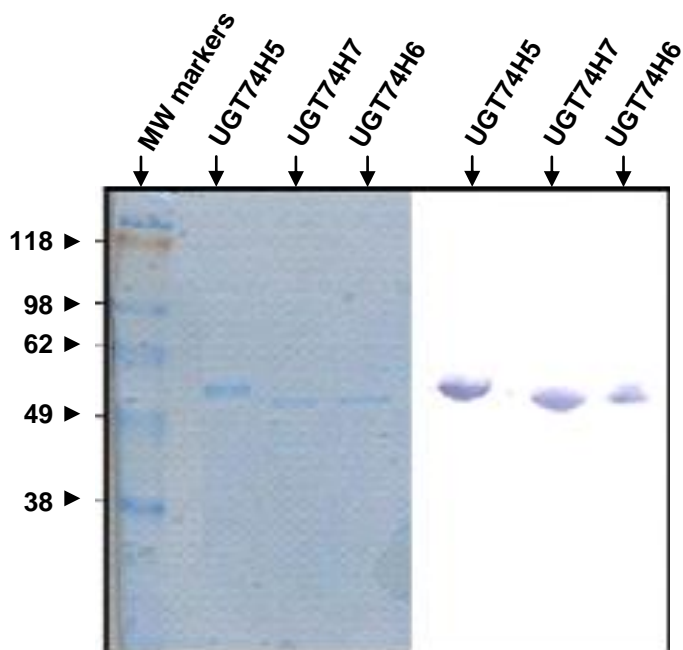

**Supplementary Figure 3.** Analysis of the three purified His<sub>6</sub>-tagged oat glycosyltransferases following expression in *E. coli*. Proteins were run on a 4-12% SDS-PAGE gradient gel and detected by staining with Coomassie brilliant blue (left) or by Western blot analysis using polyclonal antisera raised against UGT74H5 (right).

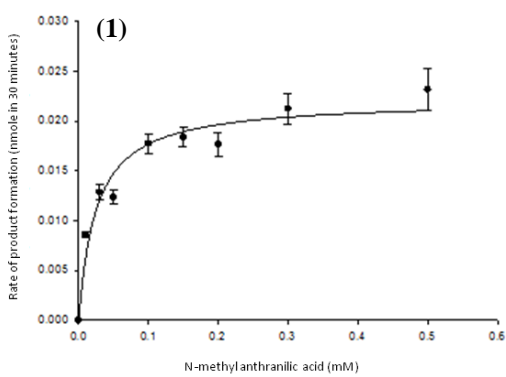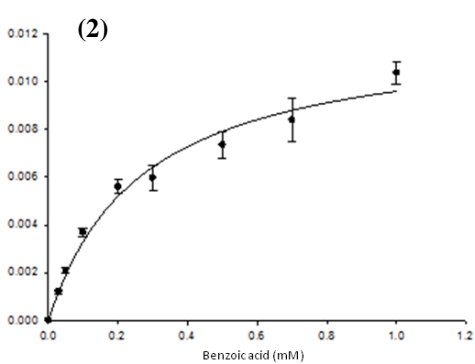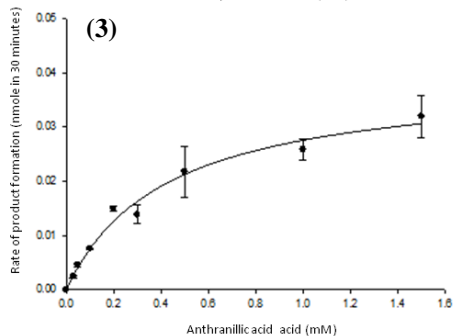

**Supplementary Figure 4A.** Enzyme kinetics for UGT74H5. Plots of the product formation rates as a function of substrate concentration (1: *N*-methylantranilic acid, 2: benzoic acid, 3: anthranilic acid).

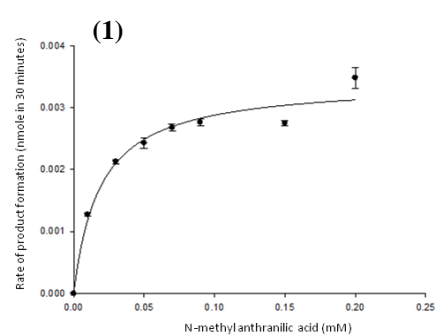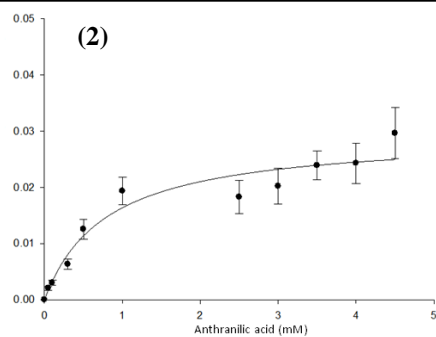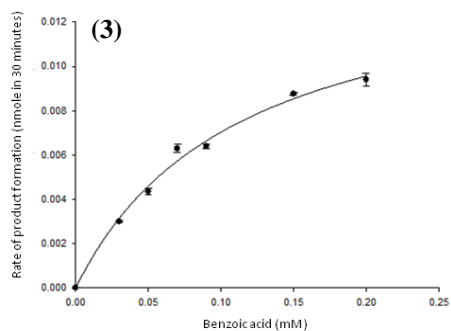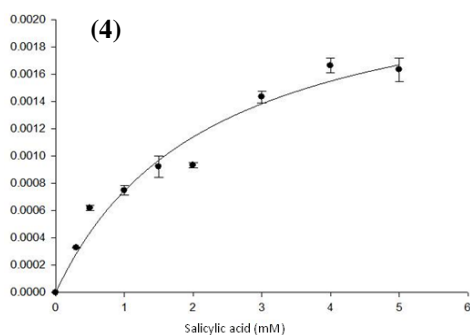

**Supplementary Figure 4B.** Enzyme kinetics for UGT74H6. Plots of the product formation rates as a function of substrate concentration (1: *N*-methylantranilic acid, 2: benzoic acid, 3: anthranilic acid, 4: salicylic acid).

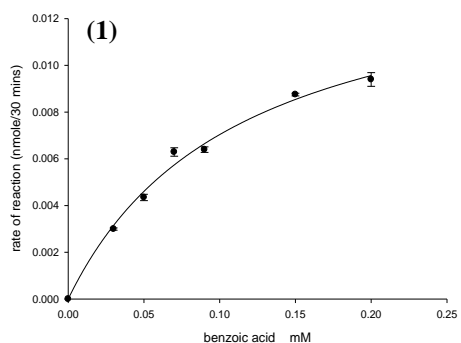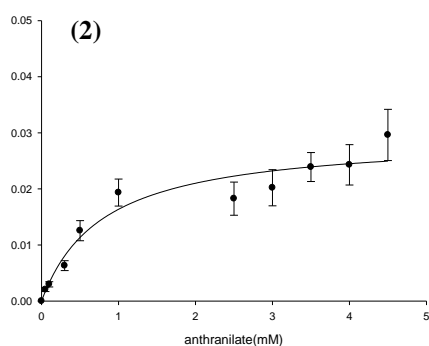

**Supplementary Figure 4C.** Enzyme kinetics for UGT74H7. Plots of the product formation rates as a function of substrate concentration (1: benzoic acid, 2: anthranilic acid).



```

      10      20      30      40      50
UGT74H7  1  MGAEPGHVYCDIHVLVLPYP LQGHINPMLQFAKRLAR TQTHIGGGGG ---VRCTLAVTP 56
UGT74H6  1  MGAEPGHVYCDIHVLVLPYP LQGHINPMLQFAKRLAR TQTHIGGGGGGGGGVRCTLAVTP 60
UGT74H5  1  MGAWEHVS-DIHVL L LYPYVQGHINPMLQFGR LA ---HIG-CVG ---VRCTLAITP 50

      70      80      90     100     110     120
UGT74H7  57  YLLGQCQDPCPGAVHLAEISDGFDRAGFLEVGDVAAYLAQLESAGSR TLD ELLRS EAEKG 116
UGT74H6  61  YLLGQCQDPCPGAVHLAEISDGFDRAGFLEVGDVAAYLAQLESAGSR TLD ELLRS EAEKG 120
UGT74H5  51  YLLRQCQDPCPGAVHLV EISDGFDSAGFELEVGDVAAYLAGMESAGSR TLD ELLRS EAEKG 110

      130     140     150     160     170     180
UGT74H7  117 RKVCAVVYDSFLQPWAPPVARRHGAACVSFF TQAPAVN LAYAHHARGGGTGGRL EGLPAG 176
UGT74H6  121 RKVCAVVYDSFLQPWAPPVARRHGAACVSFF TQAPAVN LAYAHHARGGGTGGRL DGLPAG 180
UGT74H5  111 RPIHAVVYDAFLQPWVPRVARLHGAACVSFF TQA AVN VAYSRR ---VGKIEEGLPAG 165

      190     200     210     220     230     240
UGT74H7  177 FEHEDLPTFLTMPDDCPPYLEMLLRQHVG L DAVDHVLVNS FHELQPLESDYMASKWGAKT 236
UGT74H6  181 FEHEDLPTFLTMPDDCPPYLEMLLRQHVG L DAVDHVLVNS FHELQPLESDYMASKWGAKT 240
UGT74H5  166 FEAE DLPTFLTLP ---LPYQDMLLSQFVGLDAVDHVLVNS FHELQPLESAYMES TWGAKT 222

      250     260     270     280     290     300
UGT74H7  237 VGPTVPSAYLDKRIPDDVSYGFHLYTP T TAT TAWLD AOPPRSVAYVSYFGSMAAPGPEQM 296
UGT74H6  241 VGPTVPSAYLDKRIPDDVSYGFHLYTP T TAT TAWLD AOPPRSVAYVSYFGSMAAPGPEQM 300
UGT74H5  223 VGPTVPSAYLDKRITDDVSYGFHLYTPMTATTKAWLD AOPPRSVITVSYFGSMATPGPTEM 282

      310     320     330     340     350     360
UGT74H7  297 AEMA EGLHSSGKAF LWVVRAS EASKIPDGFS EKVGTRGLVVPWVAQLEVL AHS AVGCFVT 356
UGT74H6  301 AEMA EGLHSSGKAF LWVVRAS ETSKIPDGFS ERVGT RGLVVPWVAQLEVL AHS AVGCFVT 360
UGT74H5  283 AEMA EGLHSSGKAFLWVVRAS EASKIPDGFERVGT RGLVVTWVAQLEVL AHS AVGCFVT 342

      370     380     390     400     410     420
UGT74H7  357 HCGWNS TMEALGAGLPMVAVPQWS DQPTNAKYVEDVWC VGVRRARRDPEAGVVRREEVERC 416
UGT74H6  361 HCGWNS TMEALGAGLPMVAVPQWS DQPTNAKYVEDVWC VGVRRARRDPESGVVRREEVERC 420
UGT74H5  343 HCGWNS TMEALGAGVPMVAVPQWS DQPTNAK FVEDVWC VGVRRARRDPE -GVVRREEVERC 401

      430     440     450     460     470     480
UGT74H7  417 VKEVMGADKOYARNASDWKEKAVRSMCQGS S EKNITEFLHALR - -SRKSOKS TQPKQI - 473
UGT74H6  421 VKEVMGADKOYARNASDWKEKAVRSMCQGS SDKNITEFLHALVVGSRKSOKLI I - - - - 475
UGT74H5  402 IREVTGDDK -YACNALDWKEKSKRAMSQGS SDMNITEFLQALR -RSRKS YEAKPIEPLL 459

      . . . . |
UGT74H7  473 - - - - - 473
UGT74H6  475 - - - - - 475
UGT74H5  460 VGLDA 464

```

**Supplementary Figure 5.** LC-MS/MS analysis of trypsin-digested protein from oat roots (excised following SDS-PAGE) reveals protein fragments corresponding to UGT74H5 (shown in red).
